# Supplementary material for: Specific recognition of DNA bulge sites by in situ grown fluorescent Ag nanoclusters with high selectivity
Source: Royal Society of Chemistry journal article supplement (doi:10.1039/c3dt52042k), 2013-10-08
Supplement: c3dt52042k.pdf [file c3dt52042k.pdf]

*Supporting Information for*

## **Specific recognition of DNA bulge sites by in-situ grown fluorescent Ag nanoclusters with high selectivity**

Jian Peng, Yong Shao,\* Lingling Liu, Lihua Zhang and Hua Liu

Zhejiang Key Laboratory for Reactive Chemistry on Solid Surfaces, Institute of Physical Chemistry, Zhejiang Normal University, Jinhua 321004, Zhejiang, People's Republic of China.

Fax: 86 579 82282595; Tel: 86 579 82282234; E-mail: yshao@zjnu.cn

---

\* Author to whom any correspondence should be addressed.

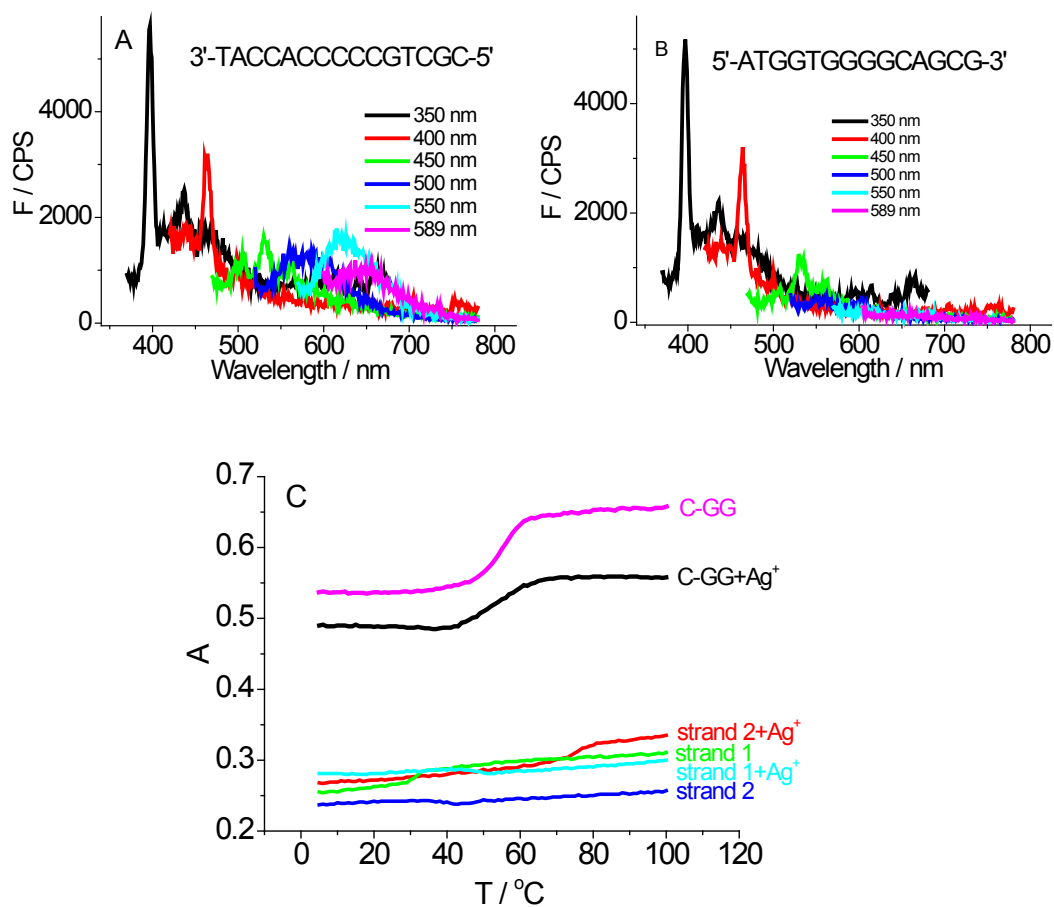

**Fig. S1** (A and B) Dependences of emission spectra of Ag NCs templated by ss-DNAs of 3'-TACCACCCCGTCGC-5' (strand 1) and 5'-ATGGTGGGGCAGCG-3' (strand 2) on the excitation wavelengths. The strand 1 and 2 hybridize to form C-GG. DNA: 1  $\mu$ M; Ag<sup>+</sup>: 15  $\mu$ M; NaBH<sub>4</sub>: 6  $\mu$ M. (C) Melting curves of strand 1 and 2 in the absence and presence of Ag<sup>+</sup>. The melting of C-GG at the same condition was shown as a control ( $T_m$ =53.1 °C, very similar as that in the absence of Ag<sup>+</sup> ( $T_m$ =54.2 °C)).

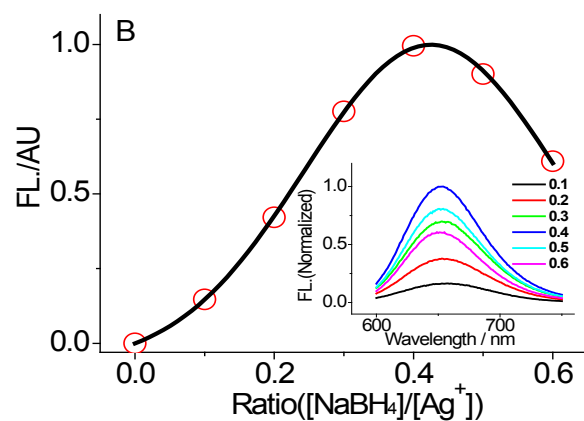

**Fig. S2** Fluorescence intensities at 652 nm under different molar ratios of NaBH<sub>4</sub> to Ag<sup>+</sup> (Ag<sup>+</sup> at 15 μM) with C-GG (1 μM) as template for production of fluorescent Ag NCs. Inset: the corresponding emission spectra.

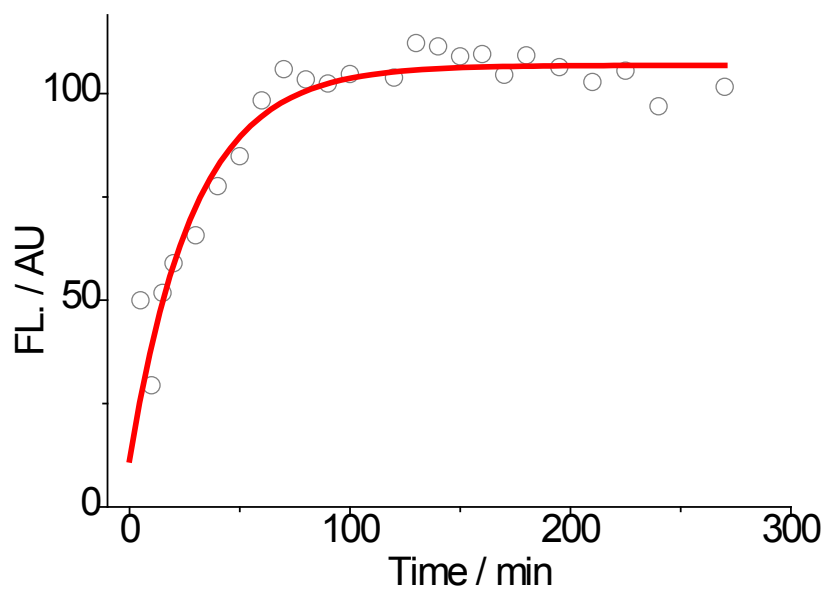

**Fig. S3** Time evolution of fluorescence intensities at 652 nm ( $\lambda_{\text{ex}}=589$  nm) for C-GG templated Ag NCs.  $[\text{C-GG}] = 1 \mu\text{M}$ ,  $[\text{Ag}^+] = 15 \mu\text{M}$ , and  $[\text{NaBH}_4] = 6 \mu\text{M}$ . Time was recorded immediately after addition of  $\text{NaBH}_4$ .

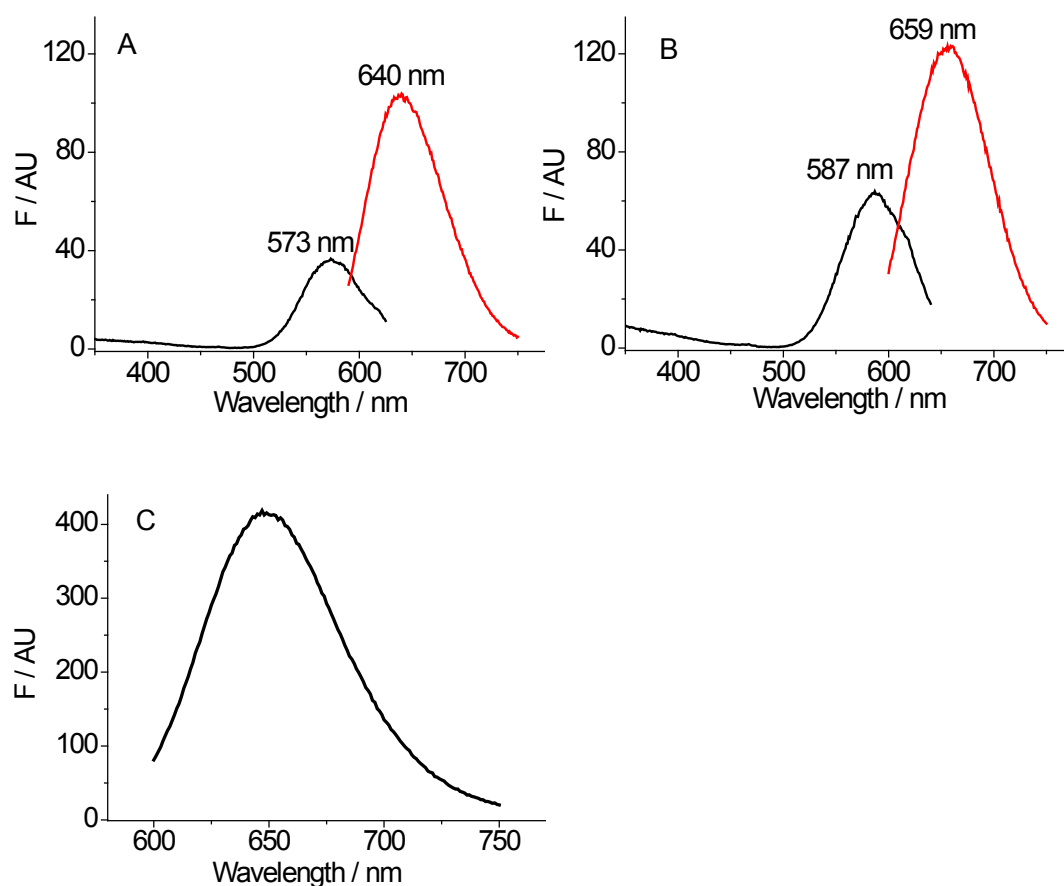

**Fig. S4** (A and B) Excitation and emission spectra of Ag NCs templated by 5'-CCCTTAATCCCC-3'. (C) Emission spectrum of Ag NCs templated by C-GG ( $\lambda_{\text{ex}}=589$  nm) as a control. Note that the fluorescence intensity is much higher than that obtained with 5'-CCCTTAATCCCC-3'. For further  $\text{Cl}^-$  experiment, in order to get a reliable comparison especially at the condition that the excitation wavelengths are not different so much between these DNAs, we found that  $[\text{DNA}] = 5 \mu\text{M}$  and  $[\text{Ag}^+] = 20 \mu\text{M}$  were suitable to match this requirement. The fluorescence experiments carried out at these concentration conditions. The fact that the obtained spectra with the ss-DNA were different from the previously reported ones (C. I. Richards, S. Choi, J. C. Hsiang, Y. Antoku, T. Vosch, A. Bongiorno, Y. L. Tzeng and R. M. Dickson, *J. Am. Chem. Soc.*, 2008, **130**, 5038) was caused by the used different solution conditions, since we have found that the solution condition has a profound effect on the fluorescence properties of Ag NCs (K. Ma, Q. H. Cui, Y. Shao, F. Wu, S. J. Xu and G. Y. Liu, *J. Nanosci. Nanotechnol.*, 2012, **12**, 861).

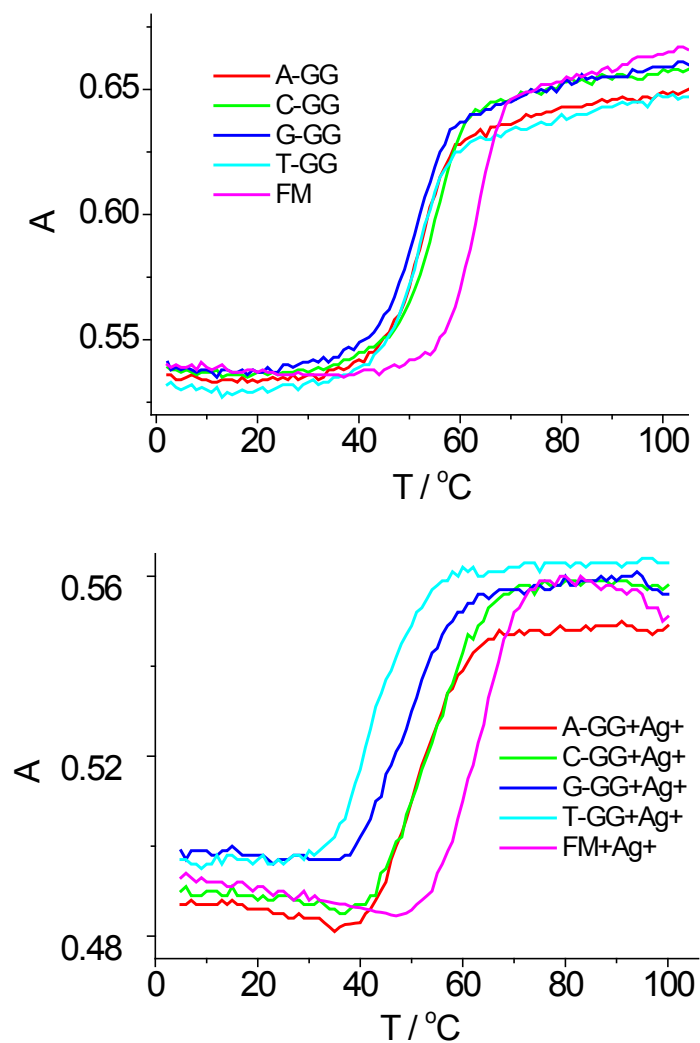

| DNA  | Without $\text{Ag}^+$ | With $\text{Ag}^+$ |
|------|-----------------------|--------------------|
| A-GG | 51.7                  | 50.7               |
| C-GG | 54.2                  | 53.1               |
| G-GG | 51.0                  | 48.7               |
| T-GG | 51.2                  | 42.4               |
| FM   | 62.3                  | 60.6               |

**Fig. S5** Typical melting curves of DNAs in the absence and presence of  $\text{Ag}^+$ . The corresponding  $T_m$  values are listed in the Table.
